# Supplementary material for: 3D printing of robust and biocompatible poly(ethylene glycol)diacrylate/nano-hydroxyapatite composites via continuous liquid interface production
Source: Royal Society of Chemistry journal article supplement (doi:10.1039/d0tb02182b), 2020-12-19
Supplement: d0tb02182b1.pdf [file d0tb02182b1.pdf]

## Supporting Information

### **3D Printing of Mechanically Robust and Biocompatible Poly(ethylene glycol) Diacrylate/Nano-Hydroxyapatite Composites via Continuous Liquid Interface Production**

*Xueyong Deng,<sup>a†</sup> Bingxue Huang,<sup>a†</sup> Rui Hu,<sup>a</sup> Liling Chen,<sup>b</sup> Yingying Tang,<sup>b</sup> Canhui Lu,<sup>a,c</sup> Zhenming Chen,<sup>d</sup> Wei Zhang,<sup>a,c,\*</sup> Ximu Zhang,<sup>b,\*</sup>*

*a. State Key Laboratory of Polymer Materials Engineering, Polymer Research Institute at Sichuan University, Chengdu 610065, China*

*b. Chongqing Key Laboratory of Oral Disease and Biomedical Sciences and Chongqing Municipal Key Laboratory of Oral Biomedical Engineering of Higher Education and Stomatological Hospital of Chongqing Medical University, Chongqing 401174, China*

*c. Advanced Polymer Materials Research Center of Sichuan University, Shishi 362700, China*

*d. Guangxi Key Laboratory of Calcium Carbonate Resources Comprehensive Utilization at Hezhou University, Hezhou 542800, China*

*† Equal contribution*

*\* Authors for correspondence: E-mail: weizhang@scu.edu.cn (W. Zhang), zhangximu@hospital.cqmu.edu.cn (X. Zhang); Phone: 86-28-85460607; Fax: 86-28-85402465.*

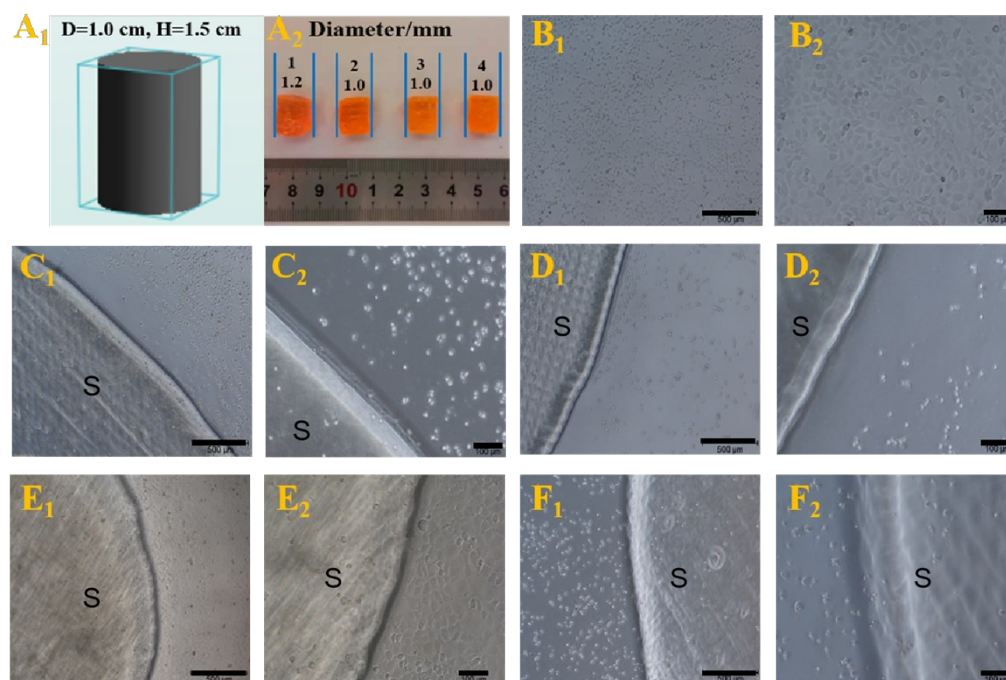

**Fig. S1.** (A<sub>1</sub>) Model of the column with a diameter of 1 cm and a height of 1.5 cm and (A<sub>2</sub>) the corresponding 3D prints with different Eosin Y loadings (samples 1-4 are printed with 0.02%, 0.01%, 0.007% and 0.005% Eosin Y in weight); (B<sub>1</sub>-F<sub>2</sub>) optical microscope images of cells cultured on different samples at different magnifications (S for the sample, B for the cell culture plate, C-F for the samples with 0.02%, 0.01%, 0.007% and 0.005% Eosin Y in weight, respectively).

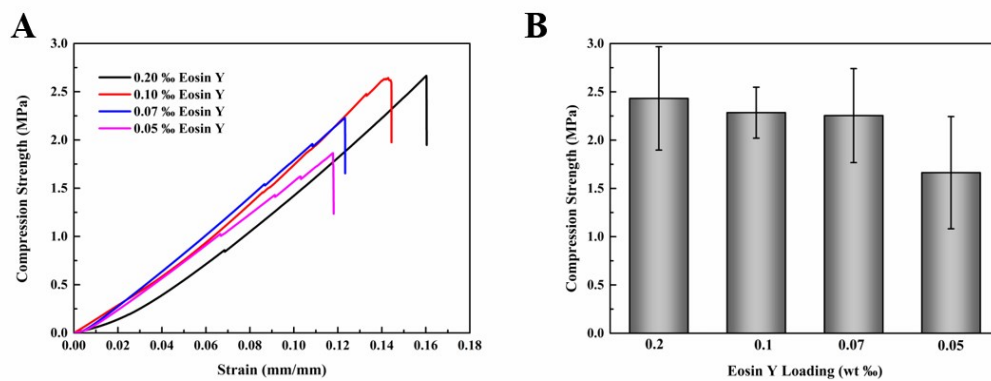

**Fig. S2.** (A) The compression stress-strain ( $\sigma$ - $\epsilon$ ) curves for samples with different Eosin Y concentrations, (B) Compression modulus of CLIP-printed PEGDA samples as a function of Eosin Y loading.

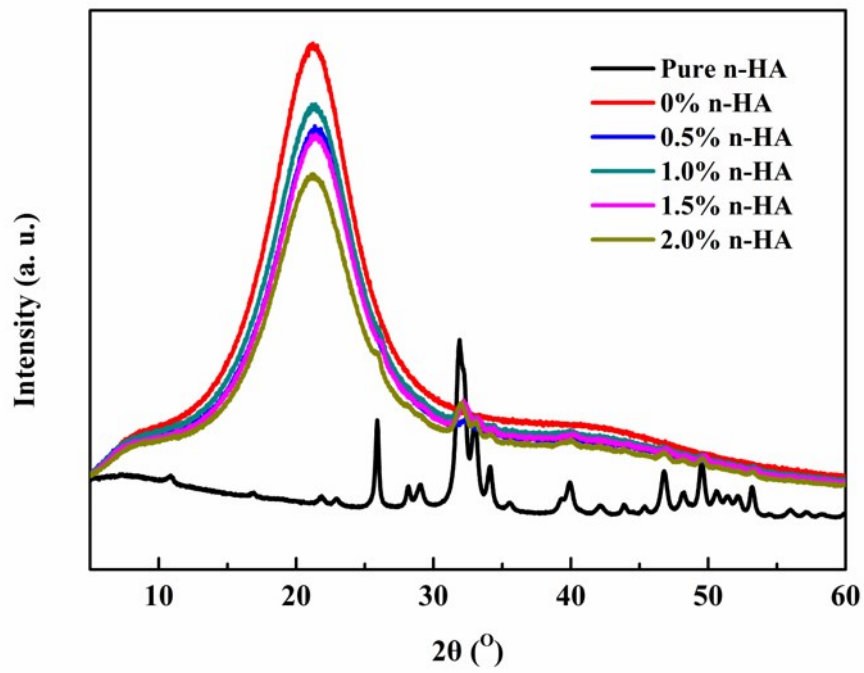

**Fig. S3.** The XRD patterns of pure n-HA and CLIP-printed PEGDA composites with different n-HA loadings (0%, 0.5%, 1.0%, 1.5% and 2.0% in weight).

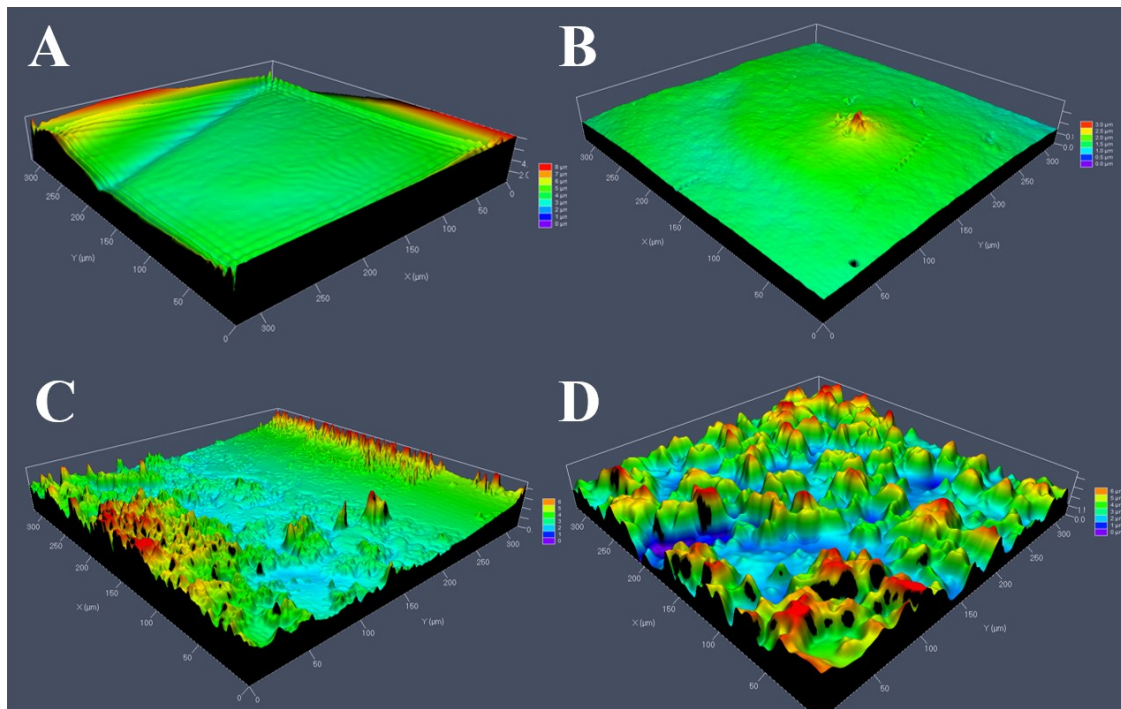

**Fig. S4.** The LSCM images of PEGDA composites with varying n-HA loadings (0.5 wt%, 1.0 wt%, 1.5 wt% and 2.0 wt %)

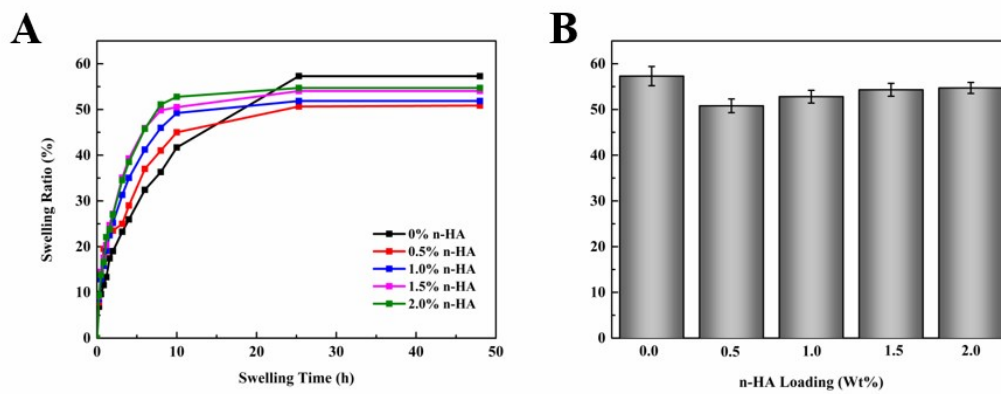

**Fig. S5.** (A) the swelling behaviors with time and (B) equilibrium swelling ratios of CLIP-printed PEGDA composites with different n-HA loadings (0%, 0.5%, 1.0%, 1.5% and 2.0% in weight ).

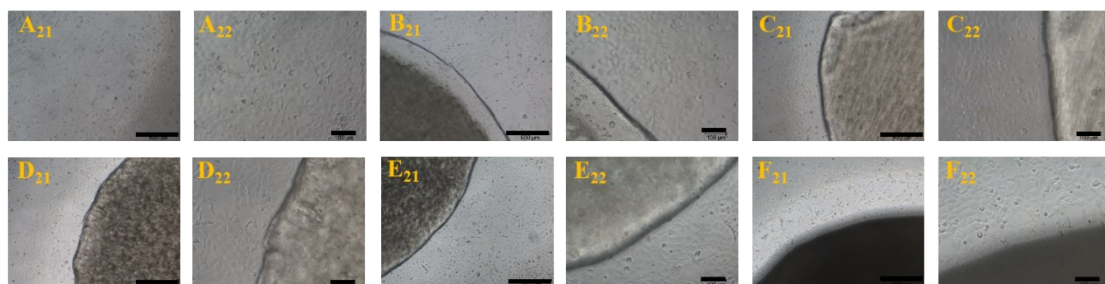

**Fig. S6.** 293 PTP line viability on the culture plate (A) and the CLIP-printed PEGDA composites (B-F) with different n-HA loadings (0%, 0.5%, 1.0%, 1.5% and 2.0% in weight) after 2 days culture. The scale bars are 500 and 100  $\mu\text{m}$ , respectively.
